# Supplementary material for: Diurnal variability of the Atmospheric Boundary Layer height over a tropical station in the Indian Monsoon Region
Source: Copernicus journal article supplement (doi:10.5194/acp-2016-542), 2016-07-04
Supplement: Supplementary file 1 [file acp-2016-542-supplement.pdf]

1 **Diurnal variability of the Atmospheric Boundary Layer**  
 2 **height over a tropical station in the Indian Monsoon**  
 3 **Region**

4 Sanjay Kumar Mehta<sup>1</sup>, Madineni Venkat Ratnam<sup>2</sup>, Sukumarapillai V. Sunilkumar<sup>3</sup>,  
 5 Daggumati Narayana Rao<sup>1</sup>, and Boddapati V. Krishna Murthy<sup>1</sup>

6 <sup>1</sup>SRM Research Institute, SRM University, Kattankulathur-603203, India

7 <sup>2</sup>National Atmospheric Research Laboratory, Gadanki-517112, India

8 <sup>3</sup>Space Physics Laboratory (SPL), VSSC, Trivandrum- 695022, India

9  
 10

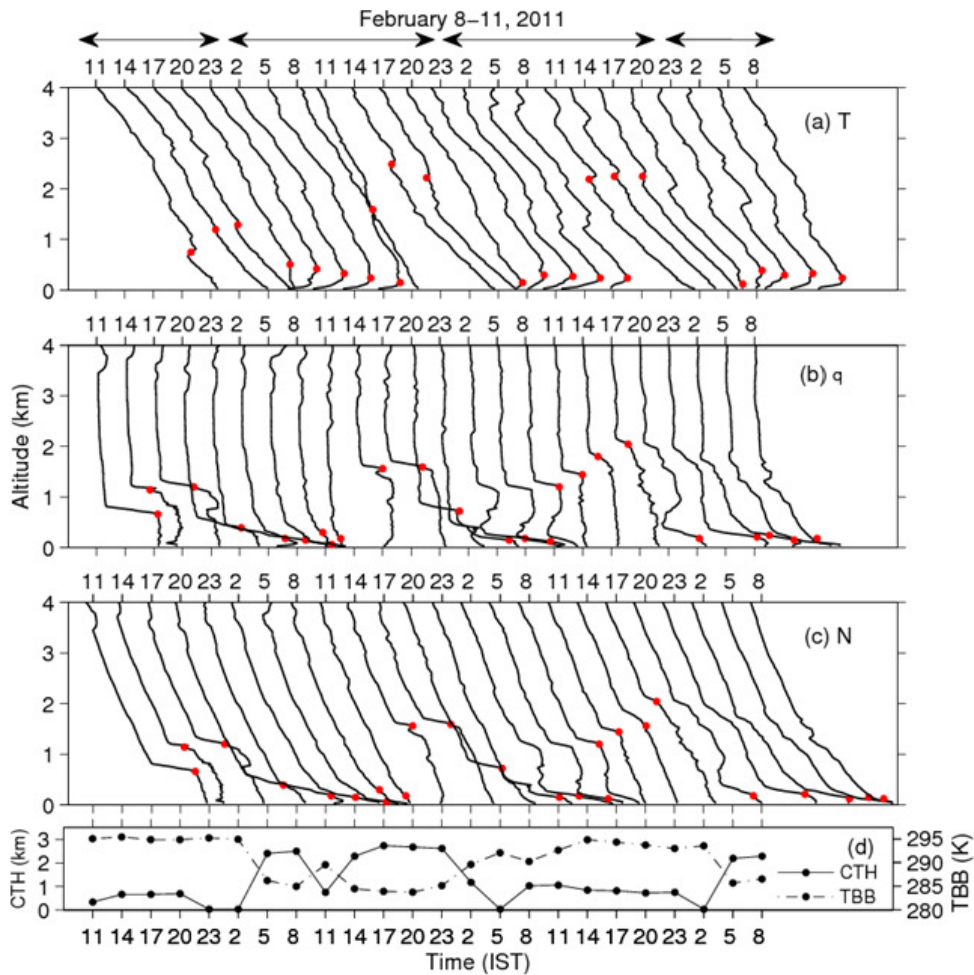

11

12 **Figure (S1). The profiles of (a) T (b) q and (c) N showing the diurnal variation of**  
 13 **the ABL for Type-1 category observed during February 8-11, 2011. Fig (d) shows**  
 14 **the infrared bright brightness temperature (TBB) within 0.25°x0.25° latitude-**

15 longitude over Gadanki (13.45°N, 79.2° E) and the cloud top height (CTH)  
16 calculated from corresponding temperature profiles. Solid red dots indicate the  
17 instantaneous ABL heights.

18

19

20

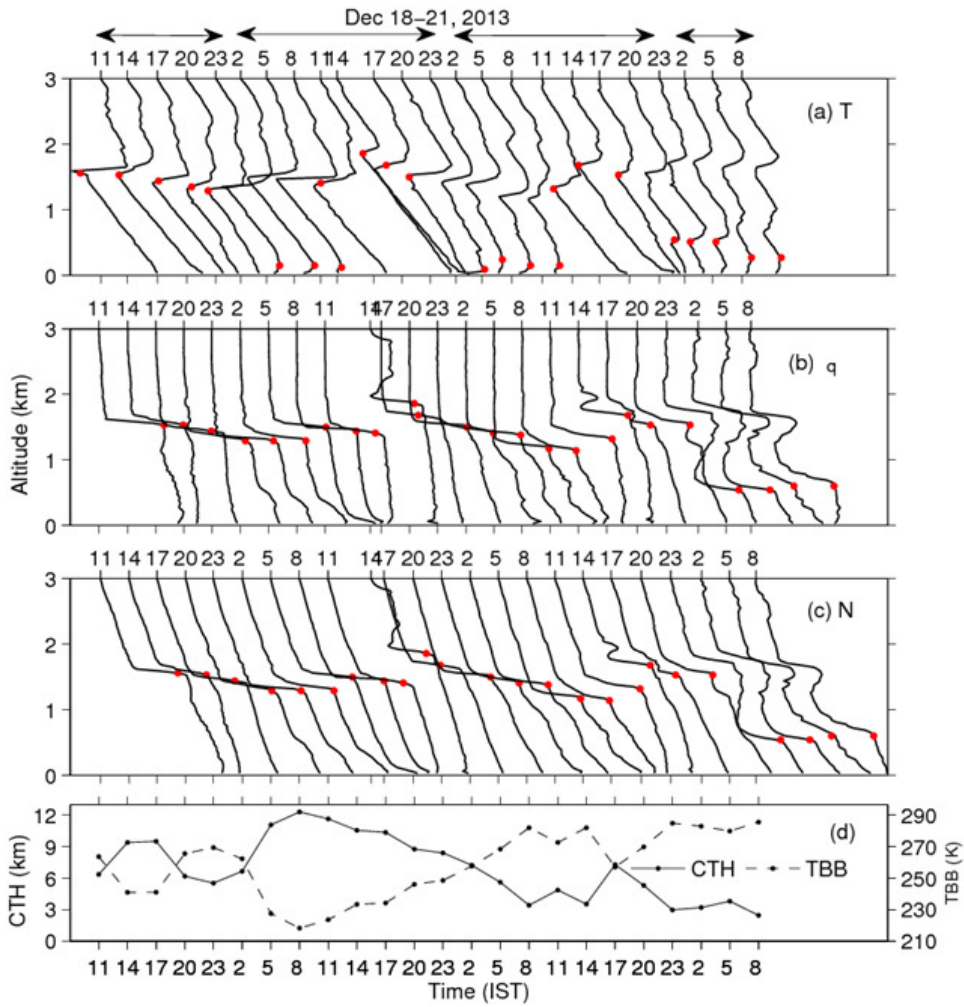

21

22

23 **Figure(S2). Same as Figure (S1) but for the diurnal variation of the ABL height**  
24 **observed during December 18-21, 2013.**

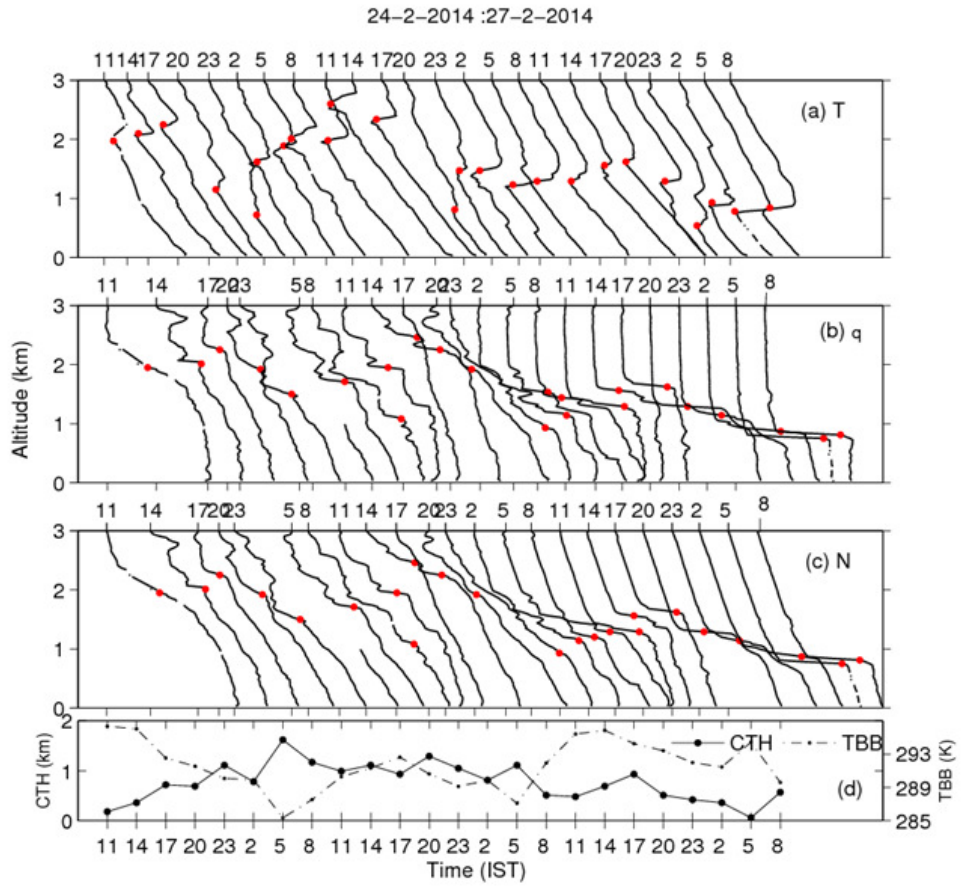

25

26 **Figure (S3). Same as the Figure (S1) but for the diurnal variation of the ABL**  
 27 **height observed during February 18-21, 2013.**

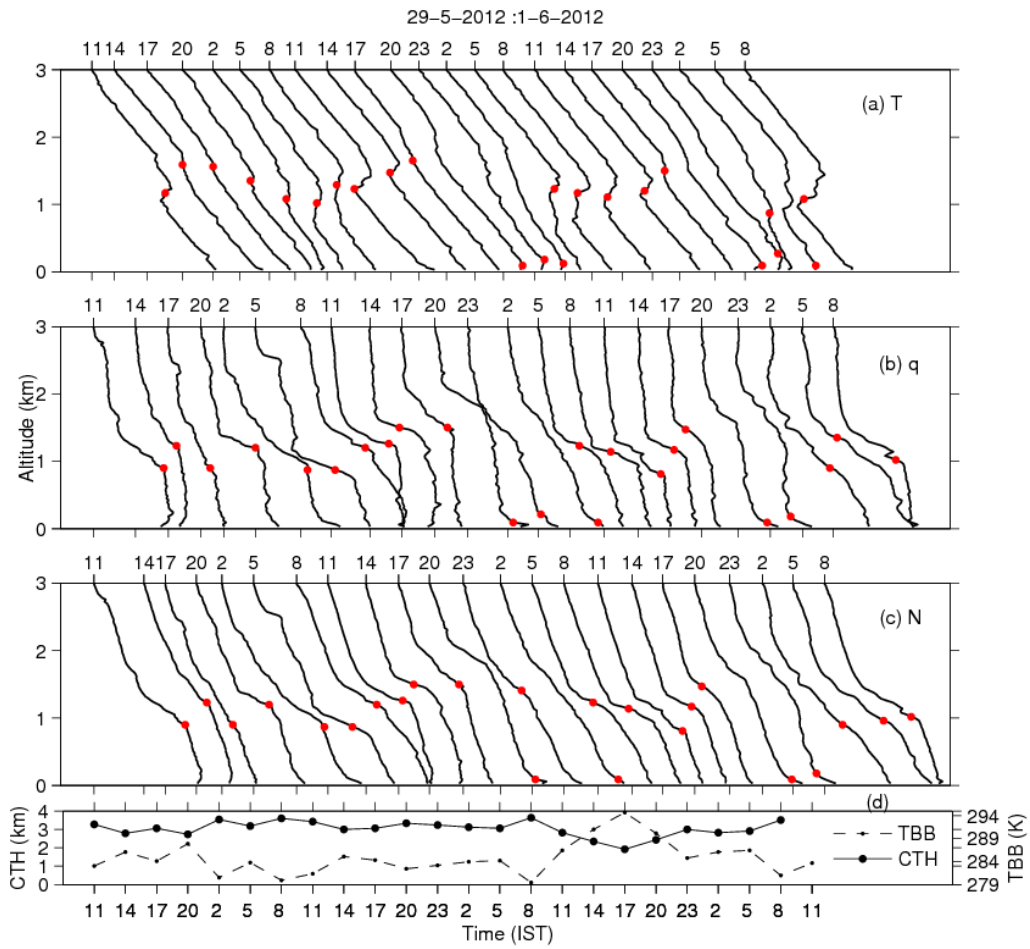

28

29 **Figure (S4). Same as the Figure (S1) but for the diurnal variation of the ABL**  
 30 **height observed during May 29-June 01, 2012.**

31

32

33

34

35

36

37

38

39
